# Supplementary material for: Preparation of Composite Films of a Conjugated Polymer and C60NWs and Their Photovoltaic Application
Source: Hindawi journal article supplement (doi:10.1155/2016/2895850), 2016-01-01
Supplement: f1 [file 2895850.f1.doc]

Supporting Information

Preparation of Composite Films of a Conjugated Polymer and C60NWs and Their Photovoltaic Application

Takatsugu Wakahara, †,* Kun’ich Miyazawa† Osamu Ito† and Nobutaka Tanigaki‡

†Fullerene Engineering Group, Advanced Materials Processing Unit, Advanced Key Technologies Division, National Institute for Materials Science (NIMS), 1-1 Namiki, Tsukuba, Ibaraki 305-0044, Japan

‡Integrated Functional Materials Group, Inorganic Functional Materials Research Institute, National Institute of Advanced Industrial Science and Technology, 1-18-31 Midorigaoka, Ikeda, Osaka 563-8577, Japan

**Table of Contents**

***Figure S1.*** Optical microscope images of C60NWs-P3HT composite film

***Figure S2.*** Diffuse reflectance UV-Vis-NIR spectra of P3HT and C60NWs-P3HT films

***Figure S3.*** Optical microscope images of s-C60NWs


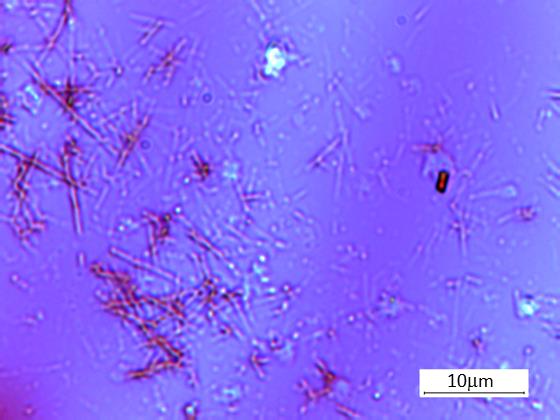


***Figure S1.*** Optical microscope image of C60NWs-P3HT composite film.

***Figure S2.*** UV-Vis-NIR spectra of P3HT and C60NWs-P3HT films


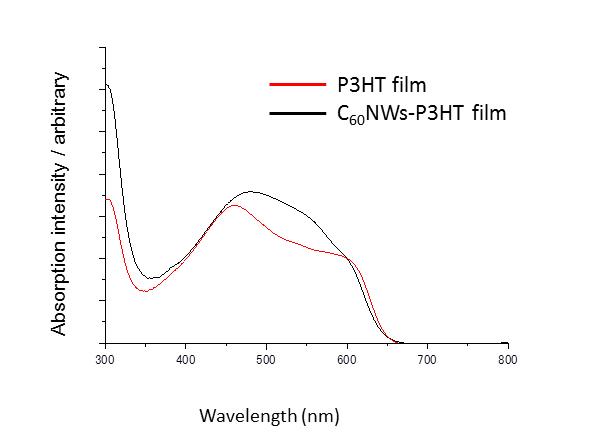


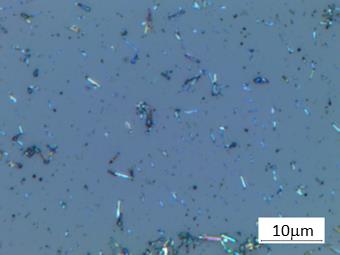


***Figure S3.*** Optical microscope image of s-C60NWs .
